# Supplementary material for: Photoelectrochemical response and electronic structure analysis of mono-dispersed cuboid-shaped Bi2Fe4O9 crystals with near-infrared absorption
Source: Royal Society of Chemistry journal article supplement (doi:10.1039/c4ra01727g), 2014-01-01
Supplement: c4ra01727g1.pdf [file c4ra01727g1.pdf]

Supplemental materials for:

**Photoelectrochemical Response and Electronic Structure Analysis of  
Mono-Dispersed Cuboid-Shaped  $\text{Bi}_2\text{Fe}_4\text{O}_9$  with Strong Near-Infrared  
Absorption**

Yangyang Zhang, Yiping Guo\*, Huanan Duan, Hua Li, Pei Wang, Lei Yang,  
Chongyang Sun, Biyi Xu, Hezhou Liu\*

State Key Laboratory of Metal Matrix Composites, School of Materials Science and  
Engineering, Shanghai Jiao Tong University, Shanghai 200240, People's Republic of  
China

\*Corresponding author.

Email Address: [ypguo@sjtu.edu.cn](mailto:ypguo@sjtu.edu.cn) (Yiping Guo)

[hzhliu@sjtu.edu.cn](mailto:hzhliu@sjtu.edu.cn) (Hezhou Liu)

Tel: +86-21-34202549

Fax: +86-21-34202749

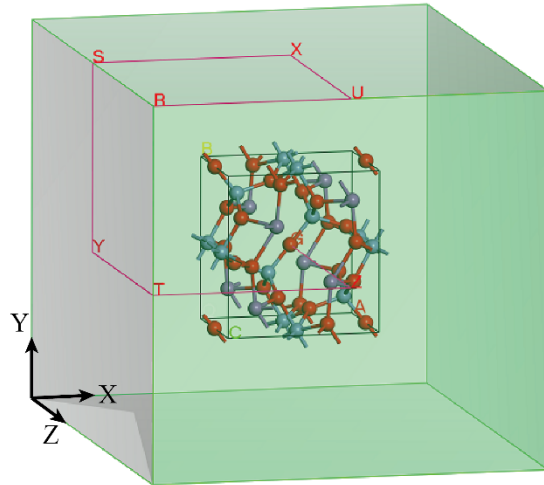

Figure S1: The k-points sampling in Brillouin zone of the  $\text{Bi}_2\text{Fe}_4\text{O}_9$  (BFO) conventional unit cell.

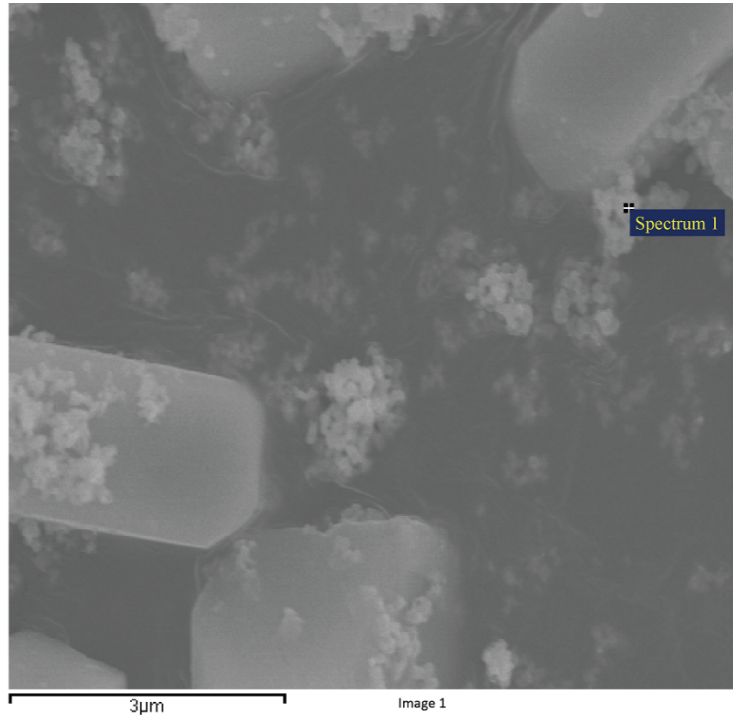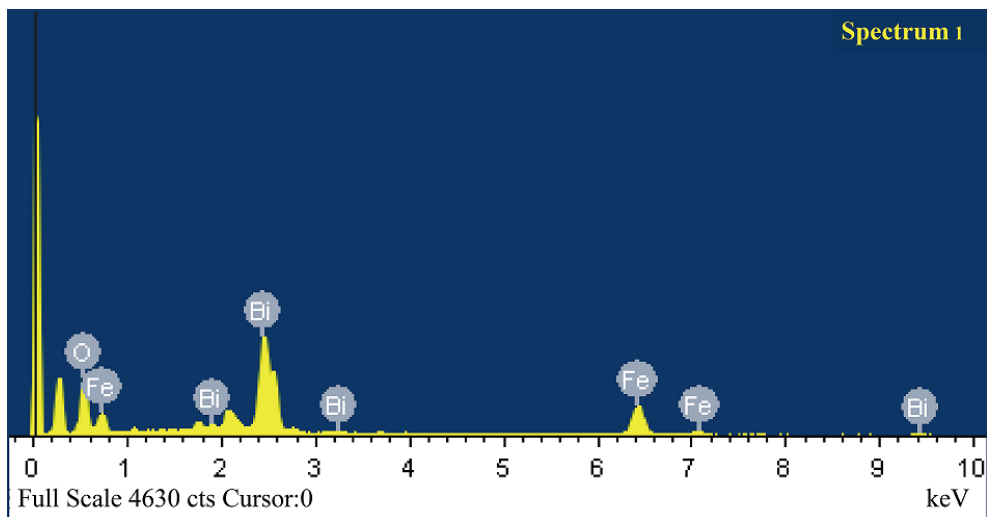

| <i>Elements</i> | <i>wt. %</i> | <i>at. %</i> |
|-----------------|--------------|--------------|
| <i>O K</i>      | 21.44        | 65.40        |
| <i>Fe K</i>     | 25.38        | 22.18        |
| <i>Bi M</i>     | 53.18        | 12.42        |
| <i>Total</i>    | 100.00       |              |

Figure S2: EDS data of the fragments around the BFO cuboids. The C and Pt peaks that originate from the conductive tape and the Pt coating, correspondingly, for

enhancing conductivity are not shown. The ratio of Fe: Bi in the fragments is 1.78:1 which is similar to that in BFO cuboids.

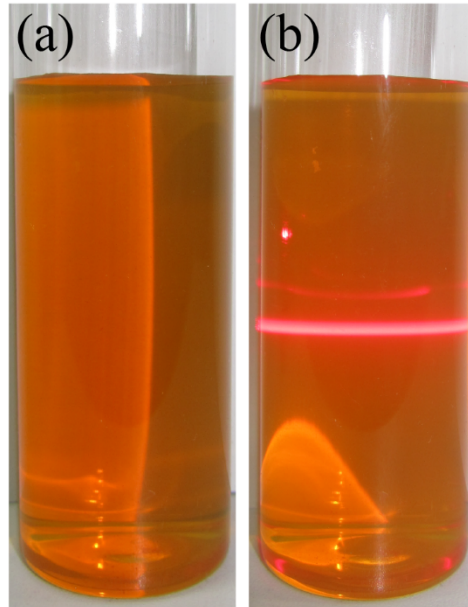

Figure S3: The light brown transparent solution of  $\text{Fe}(\text{OH})_3$  (a) and its Tyndall effect (b).

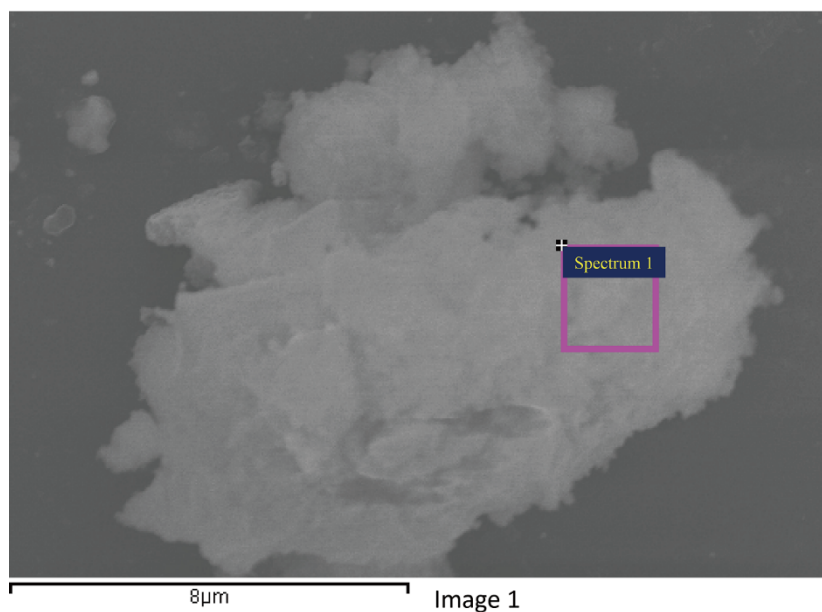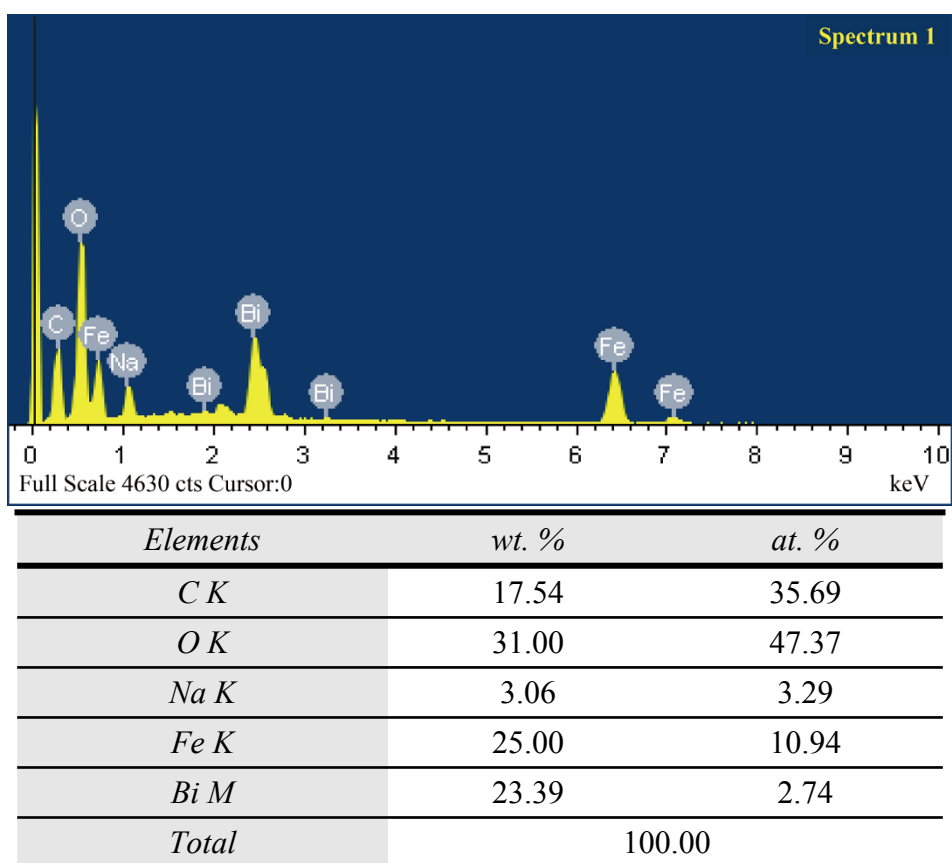

Figure S4: EDS data of the dried sol. The C peak is originated from the conductive tape. The brown sol is dried at 60 °C for 12h to remove all solvent. The content of Fe

in the dried sol is 4 times to that of Bi implying the brown sol is primarily composed by iron hydroxide.

Interplanar spacing formula in orthorhombic system:

$$d = \frac{1}{\sqrt{\left(\frac{h}{a}\right)^2 + \left(\frac{k}{b}\right)^2 + \left(\frac{l}{c}\right)^2}}$$

Lattice parameters of  $\text{Bi}_2\text{Fe}_4\text{O}_9$ :  $a=0.794$  nm,  $b=0.844$  nm,  $c=0.601$  nm

$$d_{(141)} = 0.1931 \text{ nm}$$

$$d_{(330)} = 0.1928 \text{ nm}$$

Fig S5: Calculation of the interplanar spacing of (141) plane and (330) plane. In many papers, the peak at  $\sim 47^\circ$  is usually indexed as (141). Based on the calculation above, the diffraction peak of (330) will as well appear at  $\sim 47^\circ$ , that's why this peak is also strengthened in the XRD pattern of DB-BFO.

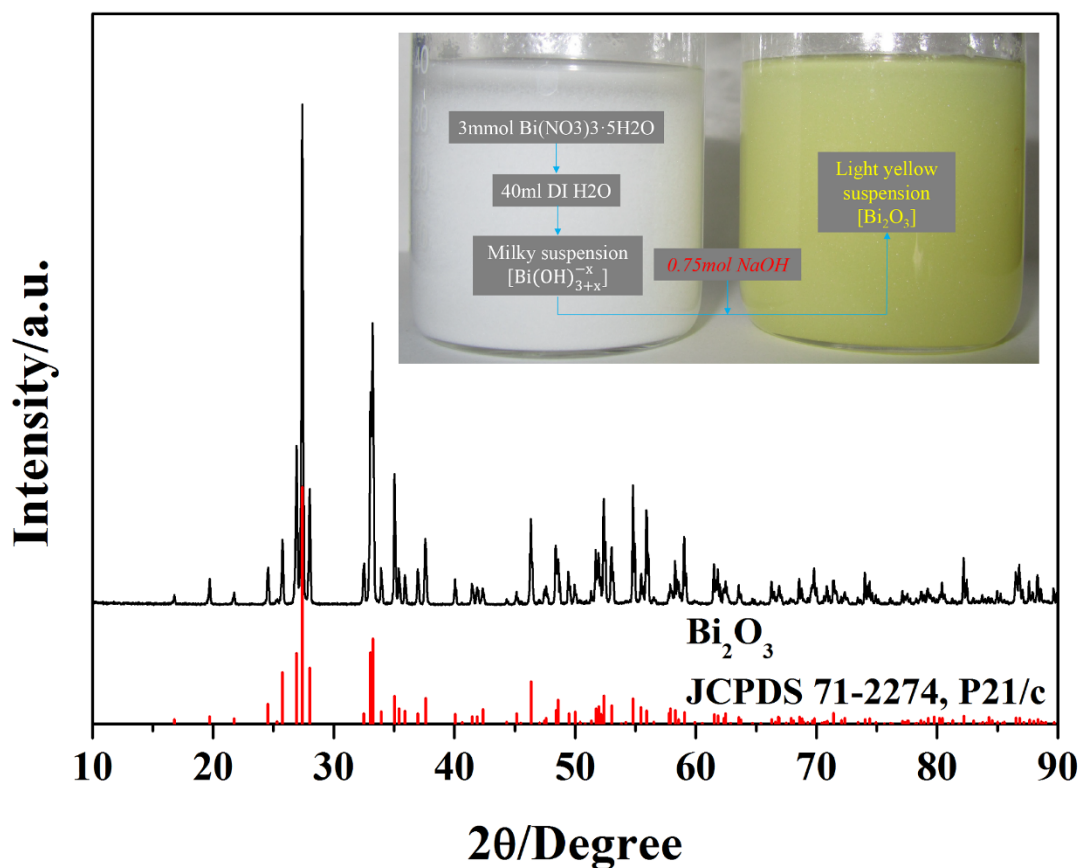

Figure S6: The XRD pattern of the light yellow precipitate dried at 60 °C, the standard XRD pattern of  $\text{Bi}_2\text{O}_3$  with a space group of P21/c is listed below. The light yellow precipitate is obtained as follows. 0.3 mmol  $\text{Bi}(\text{NO}_3)_3 \cdot 5\text{H}_2\text{O}$  was added into 40 ml DI water under constant stirring for 1 h and a homogeneous milky suspension was formed as described in the manuscript. The milk-white suspension turned into a light yellow suspension promptly upon the addition of 0.75 mol NaOH, as shown in the inset.

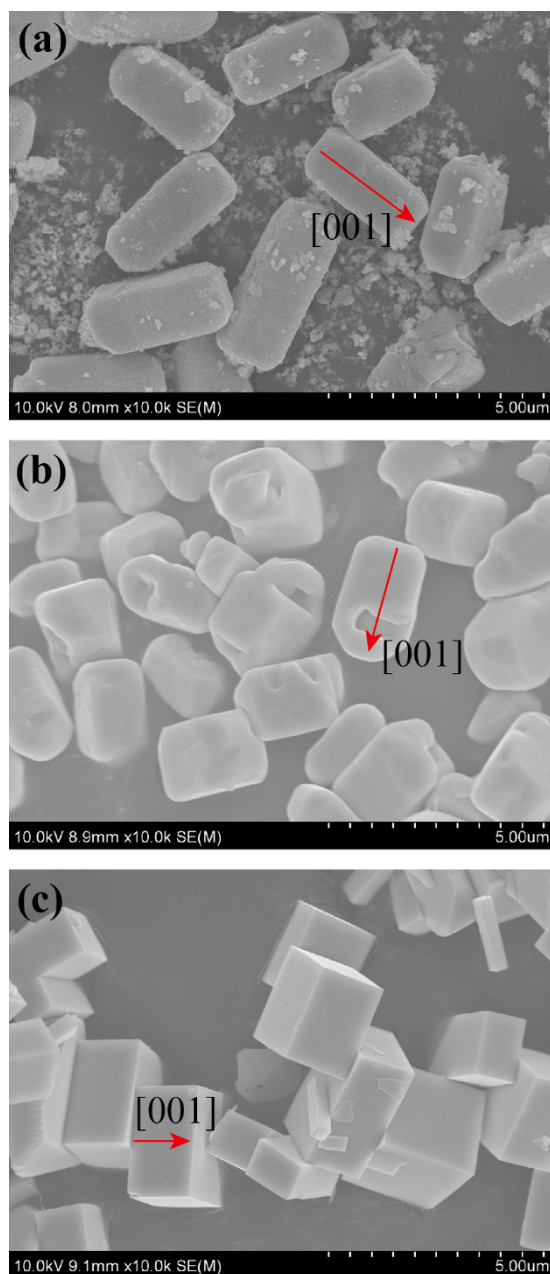

Figure S7: FE-SEM images of  $\text{Bi}_2\text{Fe}_4\text{O}_9$  crystals synthesized at  $180^\circ\text{C}$  with various concentrations of NaOH: (a)  $18.75\text{ M NaOH}$ , (b)  $12.5\text{ M NaOH}$ , and (c)  $6.25\text{ M NaOH}$  for 24 h.



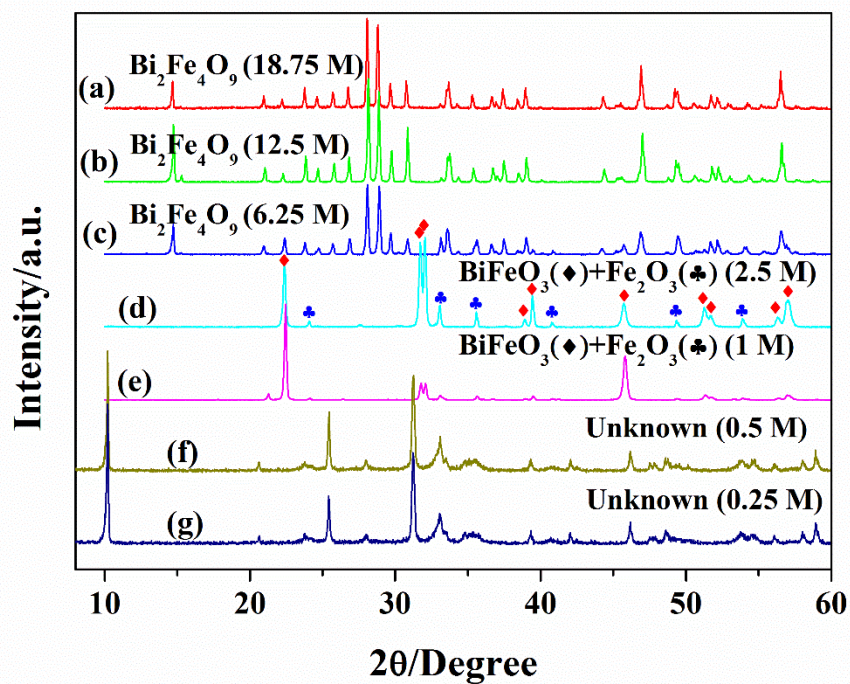

Figure S8: XRD patterns of the products synthesized in various concentrations of NaOH: (a) 18.75 M, (b) 12.5 M, (c) 6.25 M, (d) 2.5 M, (e) 1 M, (f) 0.5 M and (g) 0.25M at 180 °C for 24 h.

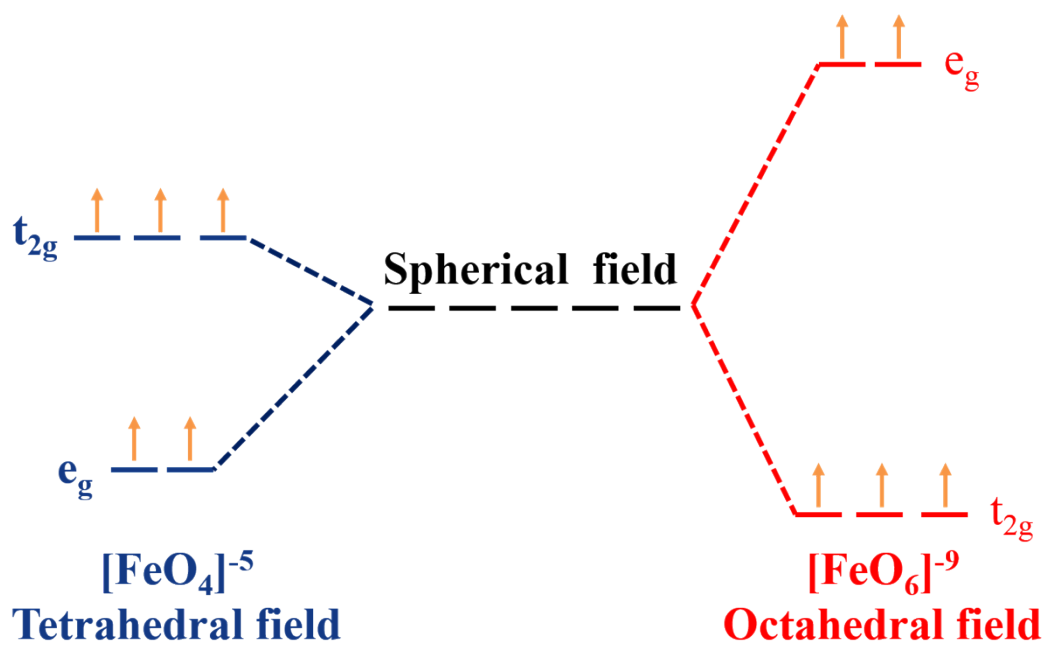

Fig S9: Schematic electronic DOS of  $\text{Fe}^{3+}$  in octahedral  $O_h$  and tetrahedral  $T_d$  coordination.
